# Supplementary material
Source: PubMed Central journal article supplement (PMC4029106)

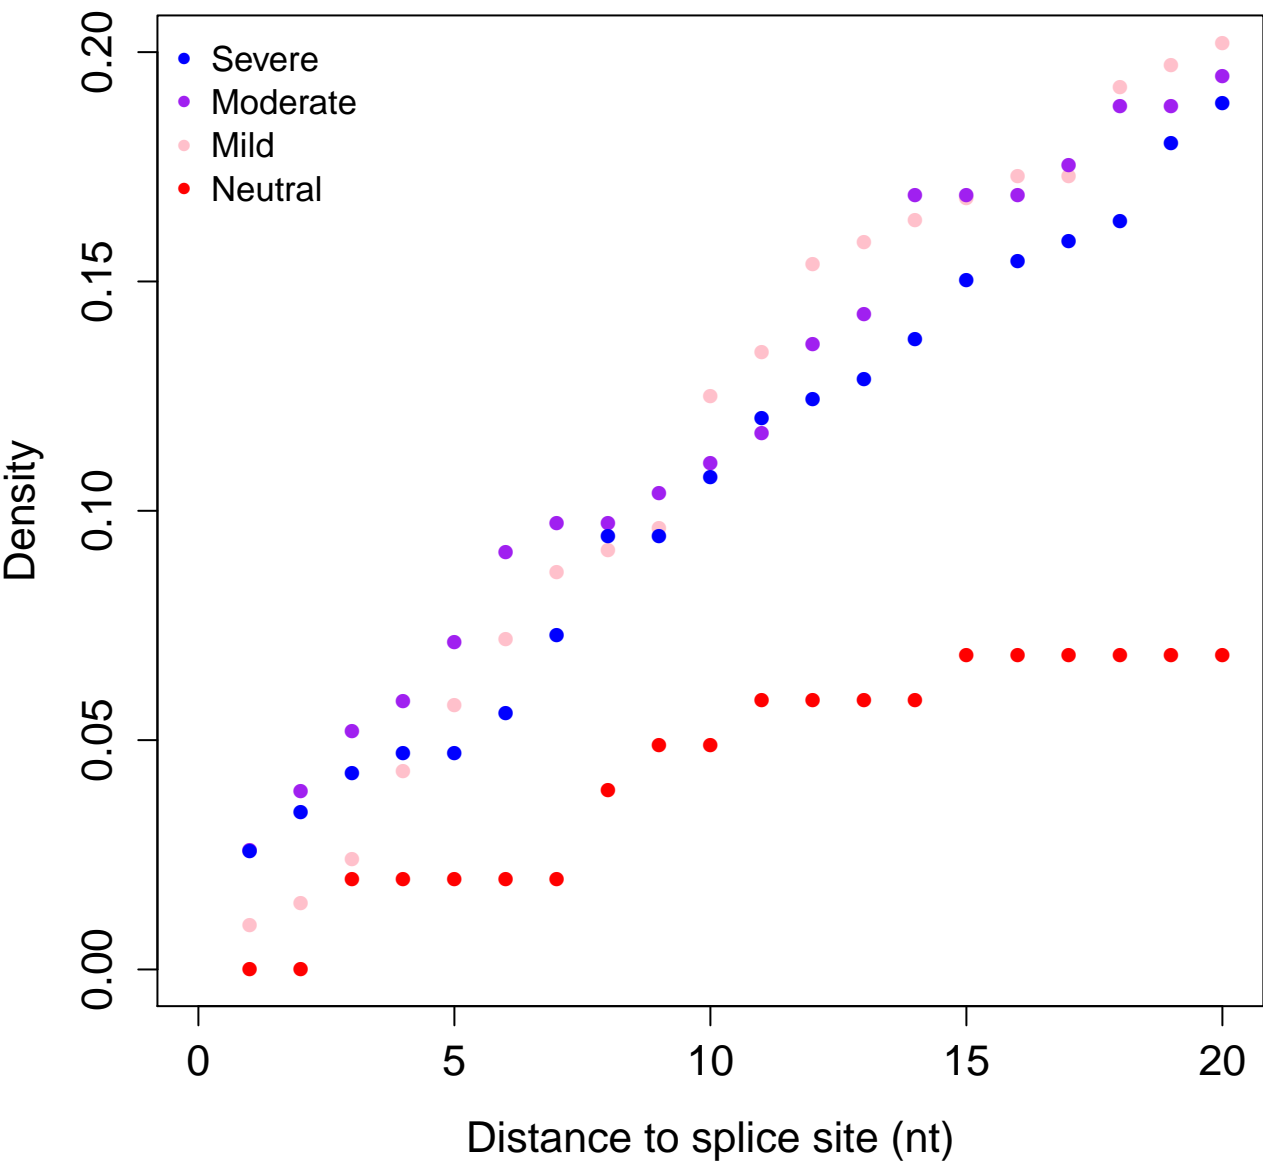

Supplement: NIHMS523566-supplement-1.pdf [file NIHMS523566-supplement-1.pdf]

**Severe**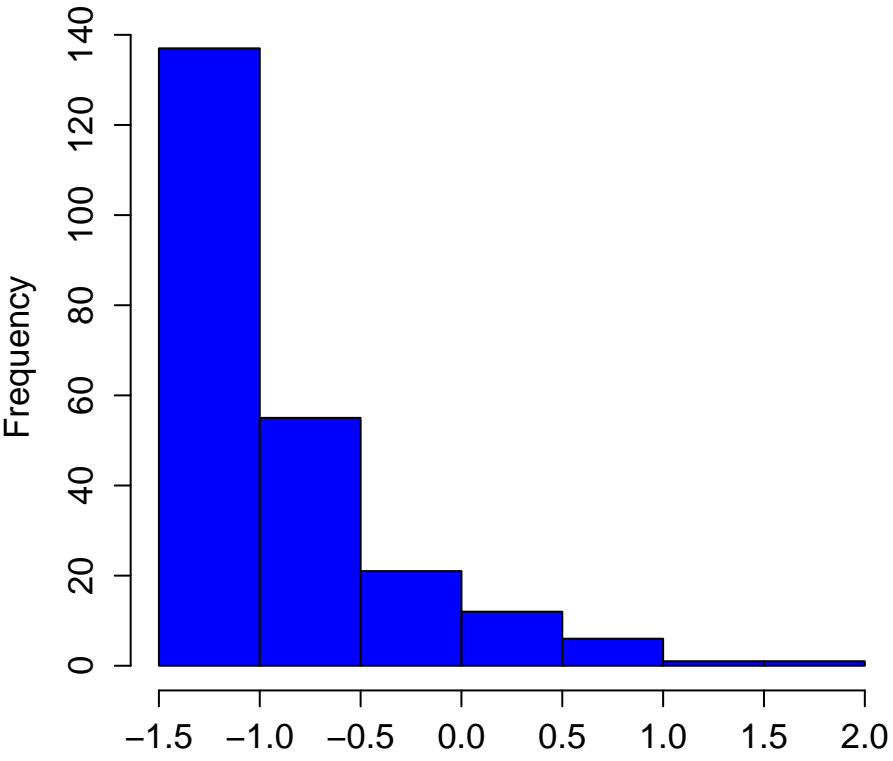**Moderate**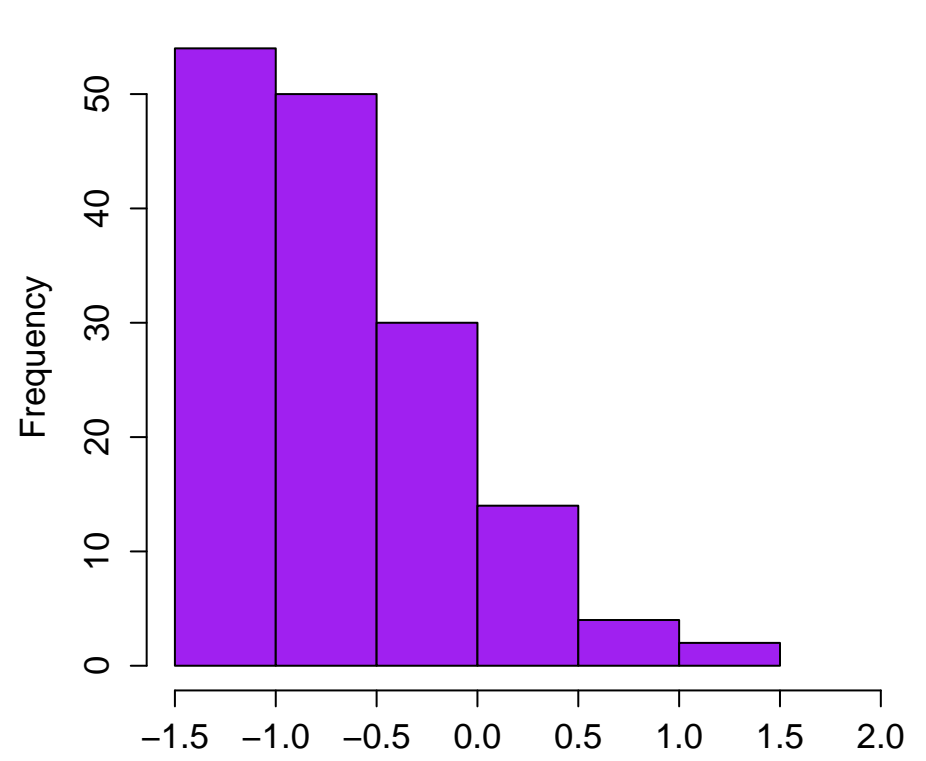**Mild**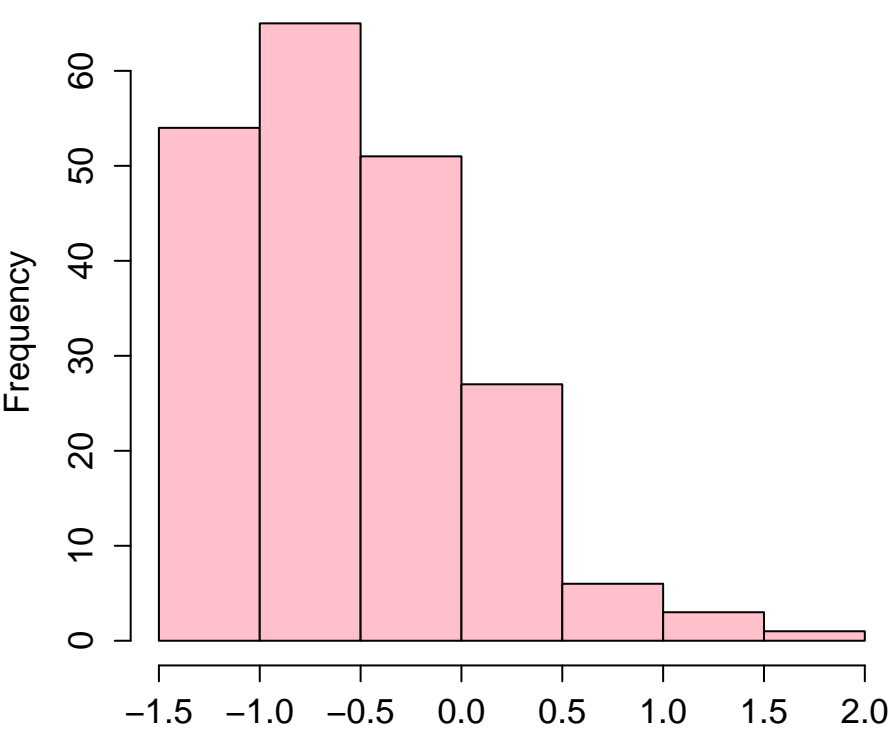**Neutral**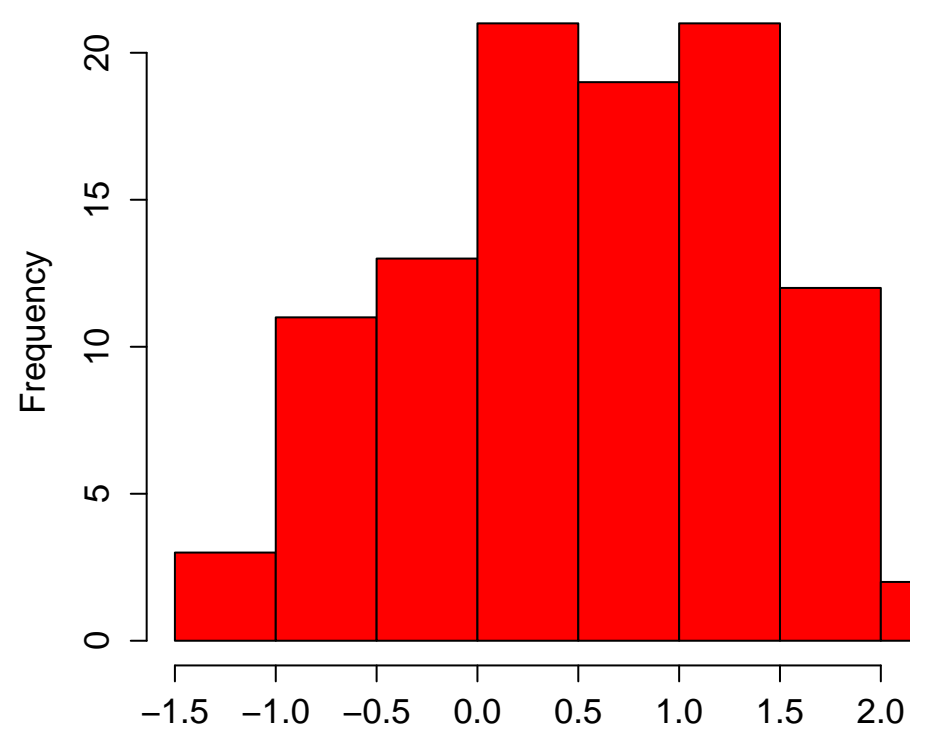

Supplement: NIHMS523566-supplement-2.pdf [file NIHMS523566-supplement-2.pdf]
